# Supplementary figures and images for: Canonical Wnt signals combined with suppressed TGFβ/BMP pathways promote renewal of the native human colonic epithelium
Source: HighWire-hosted journal article supplement (doi:10.1136/gutjnl-2012-304067), 2013-07-05

**A**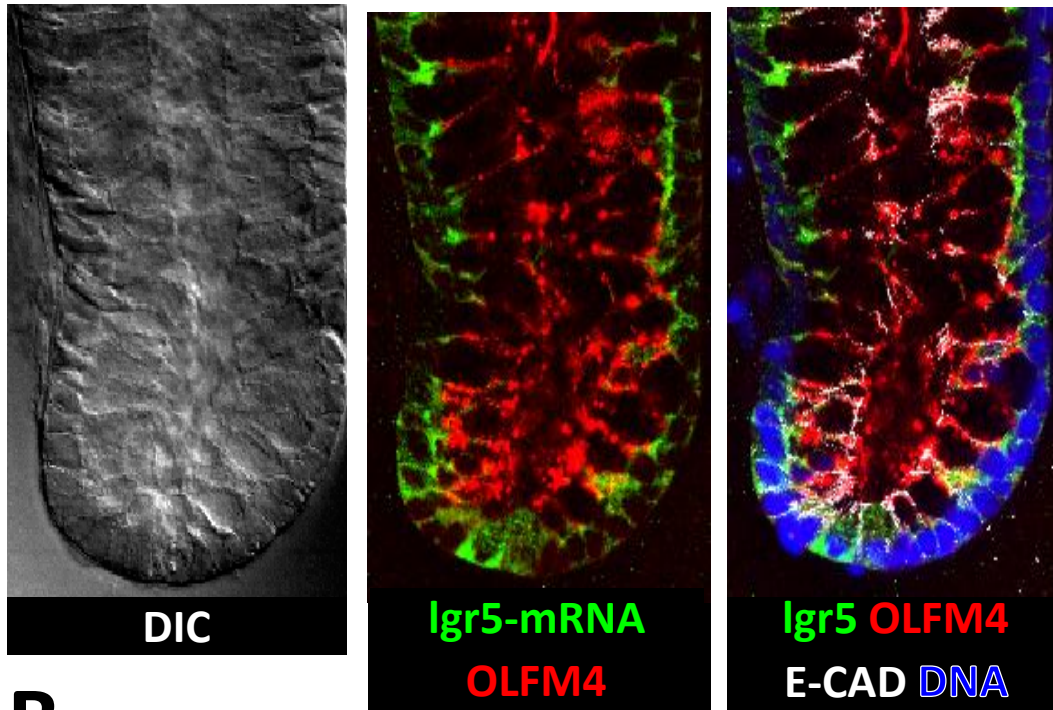**B**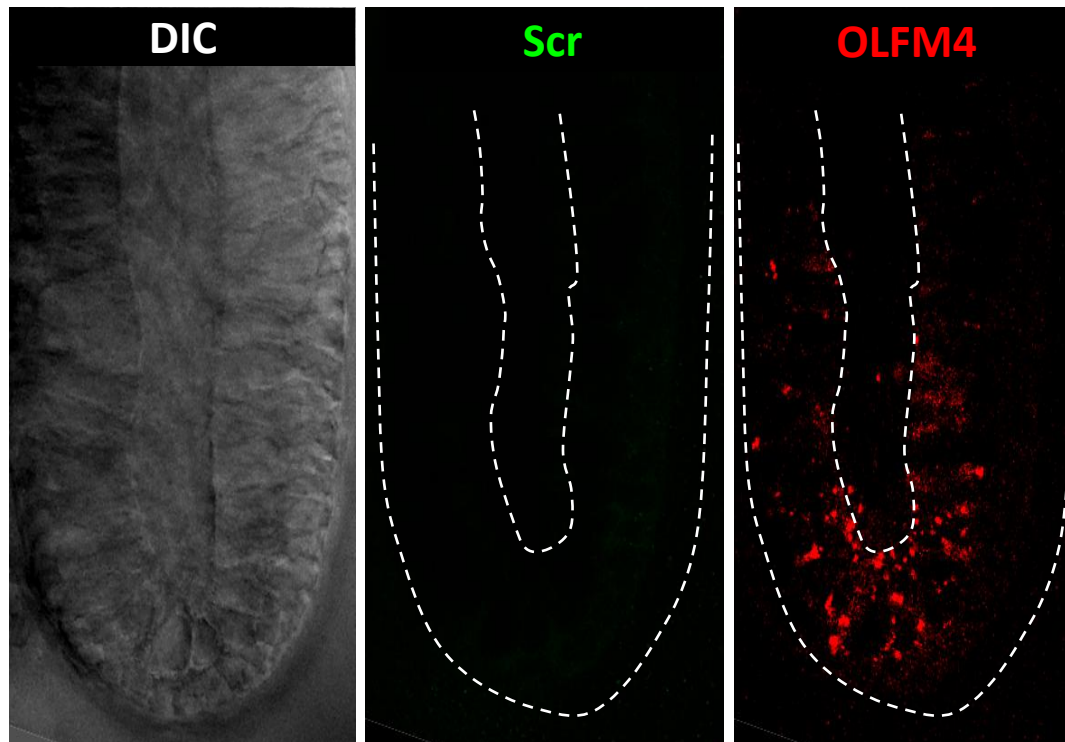**C**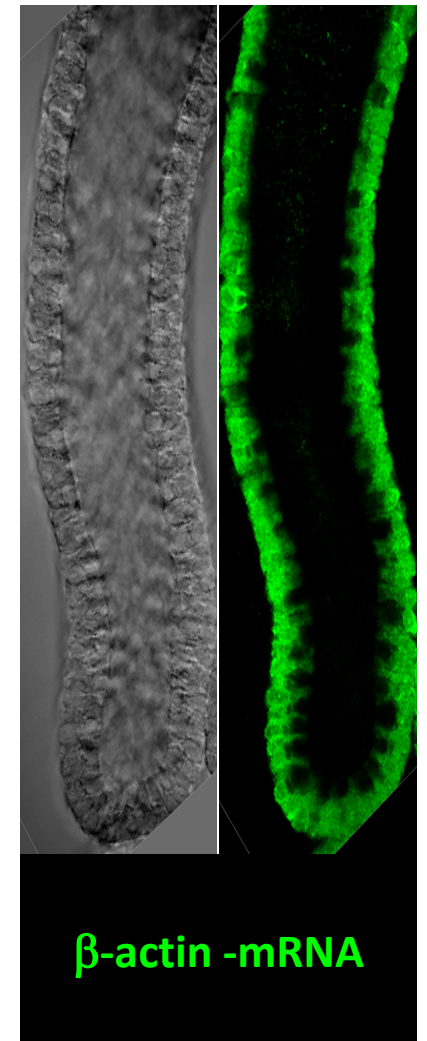

Supplementary Figure 2

Supplement: gutjnl-2012-304067supp_figure2.pdf [file gutjnl-2012-304067supp_figure2.pdf]

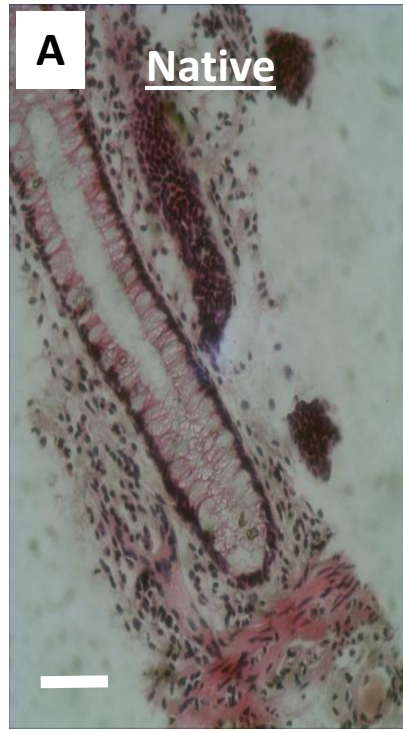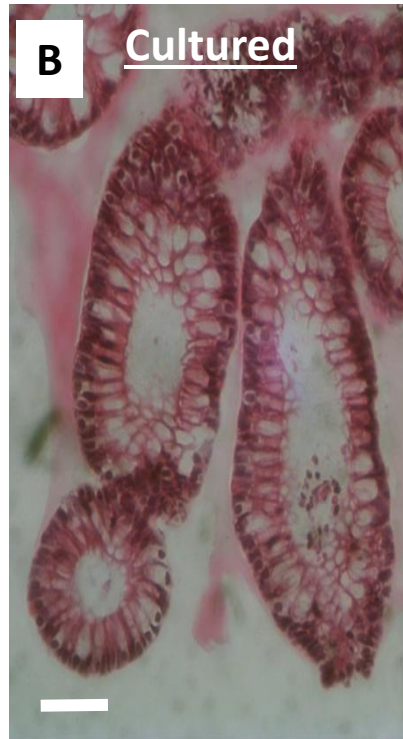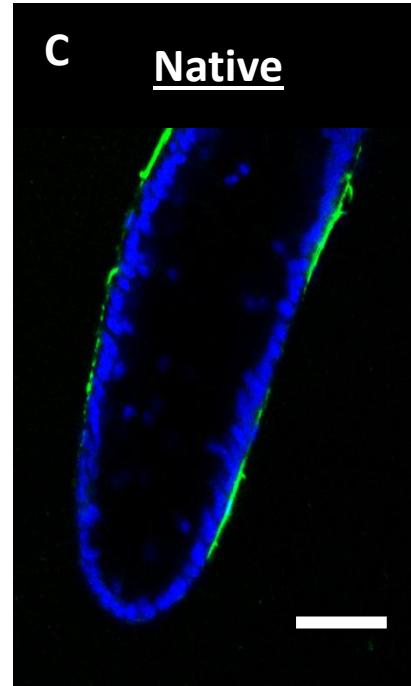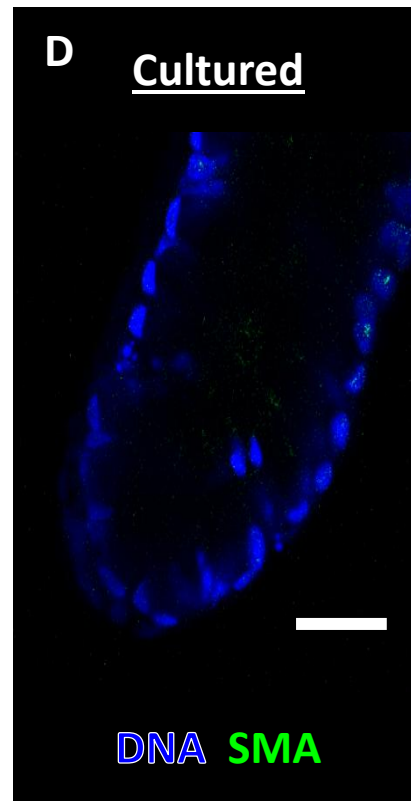

Supplementary Figure 4

Supplement: gutjnl-2012-304067supp_figure4.pdf [file gutjnl-2012-304067supp_figure4.pdf]
